## Rapid, direct detection of bacterial Topoisomerase 1-DNA adducts by RADAR/ELISA

Devapriya Sinha<sup>1,\*</sup>, Kostantin Kiiianitsa<sup>1,\*</sup>, David R. Sherman<sup>2</sup>, Nancy Maizels<sup>1,3</sup>

<sup>1</sup>Department of Immunology, University of Washington, 1959 NE Pacific St., Seattle, WA 98195, USA

<sup>2</sup>Department of Microbiology, University of Washington, 815 Republican St., Seattle, WA 98102, USA

<sup>3</sup>Department of Biochemistry, University of Washington, 1959 NE Pacific St., Seattle, WA 98195, USA

\*The authors wish it to be known that, in their opinion, the first two authors should be regarded as Joint First Authors.

To whom correspondence should be addressed. Tel., +1 206-685-4449; Fax: +1 206-221-6781; Email: [kkiiianit@uw.edu](mailto:kkiiianit@uw.edu)

Running title: Direct Assay of Bacterial Top1-DNA Adducts

**Keywords: DNA-protein crosslink, gyrase, Mycobacteria, tuberculosis, antibiotic, topoisomerase poison**

### 1 **Abstract**

2 Topoisomerases are proven drug targets, but antibiotics that poison bacterial  
3 Topoisomerase 1 (Top1) have yet to be discovered. We have developed a rapid and  
4 direct assay for quantification of Top1-DNA adducts that is suitable for high throughput  
5 assays. Adducts are recovered by "RADAR fractionation", a quick, convenient  
6 approach in which cells are lysed in chaotropic salts and detergent and nucleic acids  
7 and covalently bound adducts then precipitated with alcohol. Here we show that  
8 RADAR fractionation followed by ELISA immunodetection can quantify adducts formed  
9 by wild-type and mutant Top1 derivatives encoded by two different bacterial pathogens,  
10 *Y. pestis* and *M. tuberculosis*, expressed in *E. coli* or *M. smegmatis*, respectively. For  
11 both enzymes, quantification of adducts by RADAR/ELISA produces results comparable  
12 to the more cumbersome classical approach of CsCl density gradient fractionation. The  
13 experiments reported here establish that RADAR/ELISA assay offers a simple way to  
14 characterize Top1 mutants and analyze kinetics of adduct formation and repair. They

15 also provide a foundation for discovery and optimization of drugs that poison bacterial  
16 Top1 using standard high-throughput approaches.

17

## 18 **INTRODUCTION**

19 There is a widely recognized need to develop new drugs to treat infections, especially  
20 as many microorganisms have developed resistance to antibiotics in common use.  
21 Topoisomerases have proven to be effective drug targets not only in infectious disease  
22 but also in cancer (1,2). Topoisomerases modulate DNA topology by catalyzing  
23 cleavage and then religation of one or both strands of the duplex, forming a covalent  
24 topoisomerase-DNA complex as an obligatory reaction intermediate (3) (Fig. 1A).  
25 Accumulation of toxic Top1-DNA covalent intermediates contributes to killing of cells in  
26 which drugs or mutations impair the normal Top1 reaction cycle. Drugs that target  
27 topoisomerases cause the covalent adduct to persist, preventing release of the bound  
28 protein and religation of the DNA. This is the mechanism of cell killing by  
29 fluoroquinolone antibiotics, such as ciprofloxacin, moxifloxacin, levofloxacin, and  
30 ofloxacin, which target DNA gyrase (4); and of chemotherapeutics used to treat cancer,  
31 such as topotecan and etoposide (5,6). Mutations in topoisomerases can also impair  
32 their ability to release the covalent bond and reseal the DNA duplex.

33 The only bacterial topoisomerases targeted by drugs to date are the Type II  
34 topoisomerases, gyrase and topoisomerase IV. Efforts to identify potent small molecule  
35 inhibitors of bacterial Type IA enzymes have had only limited success thus far (7). Key  
36 to the religation step catalyzed by bacterial Top1 is coordination of a metal ion by  
37 aspartate residues of an acidic triad within the DxDxxG motif of the highly conserved  
38 Top1 TOPRIM domain (8,9) (Fig. 1B). Mutational analysis has shown that modification  
39 of the N- or C-terminal residues of this domain in Top1 from bacterial species, including  
40 *Escherichia coli*, *Yersinia pestis*, *Mycobacterium tuberculosis* and *Mycobacterium*  
41 *smegmatis*, will impair DNA religation, induce an SOS response and cause cell killing  
42 (10-14).

43 The absence of a simple, mechanism-based assay that quantifies Top1-DNA  
44 adducts formed in vivo has been a stumbling block to drug discovery and development  
45 for this target. Some features of topoisomerases themselves contribute to difficulty in  
46 systematic detection. Topoisomerase-DNA adducts are normally transient and may  
47 resolve spontaneously when drug is removed or limiting; cells may lyse in response to  
48 cell killing, releasing adducted complexes into the culture medium. The adducted  
49 enzyme may also undergo proteolytic repair, eliminating epitopes for immunodetection,  
50 as we recently demonstrated for human endogenous topoisomerase-DNA adducts by  
51 an unbiased proteomic approach (15). As the first step toward overcoming these  
52 challenges, we have developed a rapid and direct assay for quantification of  
53 topoisomerase-DNA adducts formed in living cells. The assay is based on a method  
54 referred to as "RADAR" fractionation (16,17), in which cells are lysed in chaotropic salts

55 and detergent; nucleic acids and adducted proteins are separated from free protein by  
56 alcohol precipitation; and adducted protein is quantified by immunodetection. RADAR  
57 fractionation has enabled quantification of adducts formed by bacterial and mammalian  
58 topoisomerases (16-23) and by Pol beta (24) and other mammalian proteins (21,25).  
59 We have recently validated the ability of RADAR fractionation to enrich adduct-forming  
60 proteins from human cells by mass spectrometry (15). RADAR fractionation is cost-  
61 and time-effective, and provides a considerable improvement in throughput (100-fold or  
62 more) over the classical approach for adduct recovery by CsCl density gradient  
63 fractionation (26).

64 Here we describe an assay for bacterial Top1-DNA adducts that combines  
65 RADAR fractionation and ELISA assay in microplate format. We have developed this  
66 assay using as a model Top1-DNA adducts encoded by two different bacterial  
67 pathogens, *Y. pestis* and *M. tuberculosis*, expressing epitope-tagged Top1 from  
68 inducible constructs. This enables detection by highly specific commercially available  
69 antibodies, circumventing the need to identify and characterize antibodies specific to  
70 each target of interest. We apply the RADAR/ELISA assay to quantify accumulation of  
71 DNA adducts formed by the highly toxic *Y. pestis* mutant, YpTop1-D117N, expressed in  
72 *E. coli* cells. The Z' factor of the assay is >0.5, suitable for high throughput applications.  
73 We further demonstrate that RADAR lysis disrupts the normally challenging  
74 mycobacteria cell wall and enables recovery and quantification of adducts formed by  
75 MtTop1-DNA expressed in *M. smegmatis*. These experiments provide a foundation for  
76 discovery and optimization of drugs that poison bacterial Top1 using standard high-  
77 throughput approaches.

78

## 79 **MATERIALS AND METHODS**

80

### 81 **Cloning and site-directed mutagenesis of MtTop1 constructs**

82

83 Gateway LR clonase (Thermo-Fisher) was used to clone the MtTop1 coding sequence  
84 from the pENTR vector (pENTR:3646c; (27)) into the pDTNF expression vector  
85 (pDTNF:3646c), fusing a FLAG tag to the N-terminal of Top1. The D111A, D111N, and  
86 G116S mutants of MtTop1 were generated by QuikChange using *Pfu* Turbo (Thermo-  
87 Fisher).

88

### 89 **Cell culture, Top1 induction, and viability assays**

90

91 *E. coli* strain MG1655 with chromosomally integrated YpTop1 WT (BWYTOP) or  
92 YpTop1-D117N (BW117N) bearing an N-terminal TRX tag was a gift from Prof Yuk-  
93 Ching Tse-Dinh (Florida International University, USA). Cells were cultured at 37°C in  
94 LB medium containing 25 µg/ml chloramphenicol. Top1 expression was induced in

95 exponentially growing cultures ( $OD_{600}=0.3$ ) by addition of arabinose (Sigma Aldrich).  
96 Cell division was monitored by measuring  $OD_{600}$ .

97 *M. smegmatis* (mc<sup>2</sup>155) strain was cultured in 7H9 medium with ADC  
98 supplement (HiMedia) as described (28). *M. smegmatis* was transformed using a  
99 MicroPulser™ Electroporator Bio-Rad), and transformed cells selected and propagated  
100 in medium containing 200 µg/ml hygromycin B (Thermo-Fisher). MtTop1 expression  
101 was induced in exponentially growing ( $OD_{600}=0.5$ ) cultures of *M. smegmatis* by addition  
102 of 50 ng/ml anhydrotetracycline (ATc; Takara-Clontech) (29). Cell survival was  
103 quantified by culturing cells on LB plates containing 200 µg/ml hygromycin B for 3 days  
104 at 37°C.

105 *M. tuberculosis* H37Rv (ATCC 25618) strain was grown in 7H9 medium with  
106 ADC supplement (HiMedia) as described (28). Up to  $2 \times 10^9$  Mtb bacilli were incubated  
107 in RADAR buffer for 15 min at 65°C with occasional vortexing, washed once in water,  
108 plated, and then incubated for four weeks at 37°C.

109

#### 110 **RADAR lysis reagent for bacteria**

111

112 To perform lysis and RADAR fractionation of bacteria, we used a reagent developed for  
113 proteomic analyses of nucleoprotein adducts in human cells (26), with some  
114 modifications. The lysis solution for bacteria (LSB) consisted of 5 M guanidinium  
115 isothiocyanate (GTC), 1% Sarkosyl, 1% 2-mercaptoethanol, 20 mM EDTA, 20 mM Tris-  
116 HCl (pH 8.0) and 0.1 M sodium acetate (pH 5.3), adjusted to final pH 6.5 with NaOH.  
117 The solution was filtered through 0.1 µm PES membrane (VWR) and stored in the dark  
118 at room temperature. 2-mercaptoethanol was freshly added before use. For alkaline  
119 lysis and fractionation, LSB was supplemented with 5 N NaOH to the desired  
120 concentration.

121

#### 122 **RADAR/slot blots of Top1-DNA adducts in *E. coli***

123

124 RADAR fractionation was carried out as previously described (16,17) with some  
125 modifications. *E. coli* cells ( $OD_{600} = 0.3-0.5$ ) bearing YpTop1 expression plasmids were  
126 cultured in 20 ml of LB broth with or without arabinose inducer and harvested by  
127 centrifugation at 3,500 rpm for 10 min. The pellet (approximately  $2 \times 10^{10}$  cells) was  
128 lysed in 500 µl LSB supplemented with 0.25 M NaOH, and incubated at 60°C for 15  
129 min. Samples were then sonicated with 30s pulses, 100 amplitude, for 3-4 cycles, and  
130 the extract clarified by centrifugation at 21,000 g for 10 min. To 450 µl of resulting  
131 supernatant were added 150 µl of 8 M LiCl (final concentration 2 M) and 600 µl  
132 isopropanol (equal volume), followed by centrifugation at 21,000 g for 10 min. The  
133 resulting pellet was washed thrice with 75% ethanol, briefly air dried, resuspended in  
134 400 µl freshly prepared 8 mM NaOH, dissolved on the Thermomixer at 2000 rpm at

135 room temperature and neutralized by addition of 1 M HEPES free acid solution (8  $\mu$ l).  
136 To reduce background of non-covalently bound overexpressed Top1, samples (100  $\mu$ l)  
137 were treated with RNase A for 30 min at 37°C (final concentration 20  $\mu$ g/ml),  
138 supplemented with 350  $\mu$ l LS1 and 150  $\mu$ l of 8M LiCl solution (final concentration 2M  
139 LiCl), reprecipitated with equal volume of isopropanol and resuspended in 8 mM NaOH.  
140 DNA concentrations were measured with a Qubit assay. Typical recovery was 30-40  $\mu$ g  
141 of DNA from  $1.8 \times 10^{10}$  *E. coli* cells. Prior to slot blotting, 100  $\mu$ l of sample was removed  
142 and digested with 0.5  $\mu$ l (12.5 units) Benzonase (Novagen) in the presence of 2 mM  
143  $MgCl_2$  for 30 min at 37°C.

144 For slot blotting, 100  $\mu$ l of sample containing 0.5-1  $\mu$ g of Benzonase-digested  
145 DNA in 25 mM sodium phosphate buffer (pH 6.5) was applied to a nitrocellulose  
146 membrane (Bio-Rad) pre-wet in the same buffer using a vacuum slot blot manifold (Bio-  
147 Rad). Membranes were blocked in 0.5% alkali soluble casein (Novagen) in 10 ml TBST  
148 (10 mM Tris-EDTA pH 7.5, 0.1 M NaCl, 0.05% Tween 20) for 1 hr. TRX-tagged YpTop1  
149 was detected with polyclonal rabbit anti-thioredoxin antibodies (Abcam, ab26320,  
150 1:1,000). Membranes were incubated with primary antibodies for 3 hr, washed in TBST  
151 and incubated for 1hr with HRP-conjugated anti-rabbit secondary antibodies (Thermo-  
152 Fisher; 1:10,000). All antibodies were diluted in the blocking solution, and all  
153 incubations were performed at room temperature. Membranes were developed using  
154 Super Signal West Dura (Thermo-Fisher) and imaged on a Bio-Rad Chemidoc XRS  
155 Plus Analyzer.

156

### 157 **CsCl density gradient fractionation of YpTop1-DNA adducts in *E. coli***

158

159 CsCl density gradient fractionation and adduct quantification were based on a protocol  
160 developed for bacterial gyrase and topoisomerase IV adducts (30), with some  
161 modifications. Briefly, a 50 ml culture ( $5 \times 10^{10}$  cells) was pelleted, resuspended in 3 ml  
162 buffer containing TE (10 mM Tris-HCl pH 7.5, 1 mM EDTA pH 8.0), 1x protease inhibitor  
163 cocktail (Thermo Scientific), and lysozyme (Sigma Aldrich) added to a final  
164 concentration of 0.1 mg/ml. Samples were incubated on ice for 10 min, sarkosyl added  
165 to final concentration 1%, then following an additional 30 min incubation on ice DNA  
166 was sheared by expulsion through 22G1/2 needles followed by centrifugation at 21,000  
167 g for 10 min. Supernatants (3 ml) were loaded on the top of step gradients preformed in  
168 polyallomer tubes (14 by 89 mm, Beckman), containing 2 ml each of 1.82, 1.72, 1.50,  
169 and 1.37 g/ml CsCl (Sigma Aldrich) in 10 mM Tris, 1 mM EDTA, pH 8.0. Following  
170 centrifugation in a Beckman SW41Ti rotor at 31,000 rpm for 20 hr at 20°C, the bottom of  
171 the tube was punctured, and 14 fractions were collected. DNA was quantified by Qubit  
172 assay. To compare levels of adducts formed by WT and mutant YpTop1, equal  
173 amounts of DNA from each fraction (1,000 ng) were prepared to load onto the  
174 membrane; prior to slot blotting, samples were digested with 0.25  $\mu$ l Benzonase in the

175 presence of 2 mM MgCl<sub>2</sub> for 30 min at 37°C. TRX-tagged YpTop1 was detected, as  
176 described for YpTop1 RADAR/slot blots.

177

### 178 **RADAR/ELISA assays of YpTop1-DNA adducts in *E. coli***

179

180 For RADAR fractionation in 96-well microtiter plates, cells ( $4 \times 10^7$ ) were cultured in 50  $\mu$ l  
181 medium and protein expression induced with 0.02% arabinose. Cells were pelleted by  
182 centrifugation for 5 min at 2,700 g, resuspended in 50  $\mu$ l 1x FastBreak™ Cell Lysis  
183 Reagent (Promega) supplemented with RNase A (20  $\mu$ g/ml) and incubated at 37°C for 5  
184 min, followed by addition of 50  $\mu$ l LSB premixed with 12 M LiCl (1:6, final concentration  
185 1 M LiCl). After addition of 100  $\mu$ l isopropanol (equal volume) DNA was precipitated by  
186 centrifugation for 10 min at 2,700 g. Pellets were washed with 200  $\mu$ l 75% ethanol,  
187 briefly air dried and solubilized on the Thermomixer (20 min, 2,000 rpm) in 25  $\mu$ l 8 mM  
188 NaOH, followed by neutralization with 1 M HEPES. Typical recovery following culture  
189 and fractionation in 96 well plates was 500-700 ng of DNA from  $10^8$  *E. coli* cells.

190 For the homogeneous assay, cells were not pelleted. Instead, 5  $\mu$ l 10x  
191 FastBreak™ Cell Lysis Reagent supplemented with RNase A was added directly to 50  
192  $\mu$ l of bacterial culture and incubated on the Thermomixer for 5 min at 37°C, then 50  $\mu$ l  
193 LSB-LiCl mixture was added and all subsequent steps carried out as above.

194 Sandwich ELISAs in 96-well format were used to quantify TRX-tagged YpTop1  
195 adducts in samples containing the equivalent of 100 ng DNA per well. Prior to ELISA,  
196 DNA was digested with Benzonase in the presence of 2mM MgCl<sub>2</sub>. Samples were  
197 applied to ELISA plates (Nunc Poly-sorb) pre-coated with rabbit polyclonal anti-TRX  
198 capture antibodies (EpiGentek #A57734, 0.5  $\mu$ g/ml). Primary detection of TRX-tagged  
199 YpTop1 was with primary murine monoclonal anti-TRX (BioLegend #658902, 1 $\mu$ g/ml),  
200 Secondary detection used biotin-conjugated anti-mouse IgG (BioLegend #405303, 0.5  
201  $\mu$ g/ml), followed by HRP-Streptavidin conjugates (BioLegend #405210, 1:1,000). All  
202 antibody dilutions were in 1x ELISA assay diluent (BioLegend).

203 Z' factors were calculated for assays carried out at different times post-induction  
204 (0-5.5 hr) to test the effectiveness of assay conditions and to determine the optimum  
205 time at which to assay adducts. Z' was calculated using the formula:  $Z' = 1 - (3\sigma_p + 3\sigma_b)$   
206  $(\mu_b - \mu_p)$ , where  $\sigma_p$  and  $\sigma_b$  are the standard deviation of the signals of YpTop1 D117N and  
207 YpTop1 WT, respectively;  $\mu_b$  represents the mean of the signal obtained from YpTop1  
208 WT and  $\mu_p$  is the mean of YpTop1-D117N.

209

### 210 **RADAR/ELISA assays of MtTop1-DNA adducts in *M. smegmatis***

211

212 After induction of MtTop1 expression with anhydrotetracycline (ATc, Sigma; 50 ng/ml), 2  
213 ml cultures (approximately  $2.5 \times 10^9$  bacilli) were collected and cells harvested by  
214 centrifugation at 21,000 g for 2 min. Pellets were washed with 1 ml sterile H<sub>2</sub>O,

215 centrifuged as above, and resuspended in 100  $\mu$ l TE. Suspensions were then  
216 sonicated for 3-4 cycles of 30 sec pulses, 100 amplitude, and treated with RNase A (10  
217  $\mu$ g/ml) for 30 min at 37°C. Then, 400  $\mu$ l LSB was added, followed by 15 min incubation  
218 on the Thermomixer at 60°C. Extracts were clarified by centrifugation at 21,000 g for 10  
219 min, supernatants (450  $\mu$ l) transferred to new tubes and supplemented with LiCl (final  
220 concentration 2M LiCl). After mixing with equal volume of isopropanol, DNA was  
221 precipitated at 21,000 g for 10 min. DNA pellets were washed with 75% ethanol, briefly  
222 dried in air, and 50  $\mu$ l of 8 mM NaOH was added prior to solubilization on a  
223 Thermomixer followed by neutralization with 1  $\mu$ l 1M HEPES. To perform fractionation  
224 in 96 deep-well plate format, aliquots of 0.5-2.5x10<sup>9</sup> *M. smegmatis* cells were processed  
225 as above, except all centrifugations were performed at 2,700 g. DNA concentrations  
226 were determined by Qubit assay. Prior to ELISA, DNA was digested with Benzonase in  
227 the presence of 2 mM MgCl<sub>2</sub>.

228 For direct ELISA of FLAG-tagged MtTop1 adducts isolated from *M. smegmatis*,  
229 samples were adjusted to 1xELISA coating buffer (BioLegend) and applied to untreated  
230 ELISA plates. Samples were absorbed for 2 hr at room temperature or overnight at  
231 4°C. Wells were washed 4 times with 100  $\mu$ l of 1xPBS, 5 min per wash, then blocked  
232 with 100  $\mu$ l of 1xELISA assay diluent (BioLegend). Following incubation with 1  $\mu$ g/ml  
233 mouse monoclonal anti-DDK (FLAG) antibody (60  $\mu$ l per well, 3 hr at room  
234 temperature), plates were washed 4 times for 5 min, then incubated for 45 min with 60  
235  $\mu$ l HRP-conjugated secondary goat anti-mouse IgG (Thermo Scientific, 1:5,000) and  
236 washed as above. Signal detection was performed using TMB High Sensitivity Solution  
237 (BioLegend, # 421501) according to manufacturer's instructions. Absorbance was read  
238 at 450 and 570 nm, and the A570 reading was subtracted as background from the A450  
239 signal to correct for background.

240

#### 241 **CsCl density gradient fractionation of MtTop1-DNA adducts in *M. smegmatis***

242

243 Bacteria (ca. 5x10<sup>10</sup> cells) were harvested by centrifugation, washed in water and  
244 resuspended in 3 ml TE with 1x protease inhibitor cocktail. Samples were sonicated on  
245 ice for 4 cycles of 30 Amp and 30 sec pulse time on/off, followed by addition of RNase A  
246 (Thermo Fisher) to a final concentration of 10  $\mu$ g/ml and sarkosyl to a final concentration  
247 of 1%, after which samples were incubated for 30 min on ice.

248 Density gradient centrifugation, fraction collection and DNA quantification were  
249 performed as described for YpTop1 adducts in *E.coli*. Prior to dot blotting, 10  $\mu$ l of each  
250 fraction was digested with 0.25  $\mu$ l Benzonase in the presence of 2 mM MgCl<sub>2</sub> for 30 min  
251 at 37°C. FLAG-tagged MtTop1 was detected with anti-DDK (FLAG) antibodies  
252 (Origene, TA50011, 1:2,500). Membranes were incubated with primary antibodies at  
253 room temperature for 3 hr, washed in TBST and incubated for 1 hr with HRP-conjugated

254 anti-mouse secondary antibodies (Thermo-Fisher; 1:10,000). Signal was detected, as  
255 described for the RADAR/slot blots of YpTop1-DNA adducts.

256

## 257 **RESULTS**

258

### 259 **Adducts of cytotoxic YpTop1-D117N accumulate upon expression in *E. coli***

260

261 We assayed adducts formed by YpTop1 WT and YpTop1-D117N bearing N-terminal  
262 thioredoxin (TRX) tags, expressed in *E. coli*. YpTop1-D117N bears a mutation in the  
263 TOPRIM domain (Fig. 1B) that eliminates a negatively charged residue required for  
264 Mg<sup>2+</sup> interaction, rendering the protein defective in DNA religation and extremely  
265 cytotoxic upon expression in *E. coli* cells (11,12). YpTop1 WT and YpTop1-D117N  
266 were expressed from an arabinose-inducible promoter, and OD<sub>600</sub> of the cultures  
267 determined during 4 hr following induction of protein expression by addition of  
268 arabinose. Induction did not affect viability of cells expressing YpTop1 WT, but a clear  
269 drop in OD<sub>600</sub> occurred in cells expressing YpTop1-D117N (Fig. 2A). Plating assays  
270 carried out at 3 hr postinduction confirmed that expression of YpTop1-D117N, but not  
271 YpTop1 WT diminished cell viability (Fig. 2B). Analysis of DNA adducts by RADAR/slot  
272 blot identified only a faint signal in samples from uninduced cultures or from induced  
273 cultures expressing YpTop1 WT, but an intense signal in samples from induced cultures  
274 expressing YpTop1-D117N (Fig. 3C). Thus, impaired survival caused by induction of  
275 YpTop-D117N expression in *E. coli* correlated with accumulation of DNA adducts as  
276 assayed by RADAR/slot blot.

277

278 We used the classical approach of CsCl density gradient fractionation (26) to  
279 confirm the results of RADAR/slot blot. Extracts of cultures expressing TRX-tagged  
280 YpTop1 WT or YpTop1-D117N, uninduced or induced by 150 min culture with  
281 arabinose, were fractionated on a CsCl step gradient, and the DNA concentration of  
282 each fraction was measured and plotted, showing that DNA peaked in fractions 4-6 (Fig.  
283 2D). Slot blots showed that signals from free protein were evident in fractions 7-8 of all  
284 samples, which are near the top of the gradient (Fig. 2E). The free protein signal  
285 increased in response to induction of Top1 expression with arabinose, as expected.  
286 The DNA peak-containing fractions of intermediate density (fractions 4-6) exhibited  
287 clear signals only in arabinose-induced cultures, with a stronger signal evident in the  
288 fractions from cells expressing YpTop1-D117N (Fig. 2E, right). To assess adduct  
289 recovery from induced cells, the Top1 signal was quantified by densitometry (Fig. 2F).  
290 This showed that more adducts accumulated in *E. coli* cells expressing YpTop1-D117N  
291 mutant than YpTop1 WT, validating the results of the RADAR/slot blot.

291

### 292 **Reproducible RADAR/ELISA assay in microtiter format**

293



294 To further streamline RADAR quantification of adducts, we scaled down cell numbers to  
295 enable adduct quantification in microtiter plates by RADAR/ELISA assay (17). As  
296 outlined in Fig. 3A,  $5 \times 10^8$  cells were cultured, Top1 expression induced with arabinose,  
297 pelleted, lysed by treatment with chaotropic salts and detergent, and the sample then  
298 alcohol precipitated to recover nucleic acids and covalently bound proteins,  
299 resuspended, and finally aliquoted to quantify DNA recovery by Qubit assay and detect  
300 the Top1 signal by ELISA. The microtiter plate format allows multiple samples to be  
301 processed in parallel, facilitating kinetic analysis of adduct accumulation.  
302 RADAR/ELISA assays of adducts during the first 5.5 hr after arabinose induction of  
303 YpTop1 expression showed that the signal increased through 2 hr and dropped  
304 dramatically at 4 hr (Fig. 3B). This timing correlated with the reduction of OD<sub>600</sub> in the  
305 culture expressing YpTop1-D117N (Fig. 2B), suggesting that adducts might be released  
306 into the medium upon cell lysis.

307 To assay adducts in both intact cells and the culture medium, we devised a  
308 “homogenous assay” in which cells were not pelleted prior to addition of lysis buffer.  
309 Instead, cell lysis and ethanol precipitation were carried out on the entire contents of  
310 each well of a 96-well micro-titer plate. RADAR/ELISA assay showed that the protein  
311 signal as detected by this approach peaked at 2 hr and then decreased gradually (Fig.  
312 3C), evidence of reduced sensitivity of the assay to cell lysis.

313 To establish whether the homogeneous RADAR/ELISA assay was sufficiently  
314 quantitative and reproducible for high throughput applications, we determined Z' factors  
315 for different time points of Top1 induction. Assays with Z' > 0.5 are considered excellent,  
316 and this criterion was satisfied by homogeneous RADAR/ELISA assay of Top1-DNA  
317 adducts at 1-2 hr post-induction (Fig. 3D).

318

### 319 **RADAR lysis conditions efficiently recover DNA from *Mycobacterium* sp.**

320 To extend the RADAR/ELISA assay to a context other than *E. coli*, we focused on  
321 *Mycobacteria*. *Mycobacterium tuberculosis* (Mtb) causes tuberculosis (TB), a major  
322 challenge to human health worldwide and the deadliest infectious disease, after AIDS  
323 (WHO, 2019; <https://www.who.int/tb/en/>). Mtb encodes a single type IA DNA  
324 topoisomerase (MtTop1) that is crucial for viability and predicted to be a drug target (31-  
325 33). *Mycobacteria* are notoriously difficult to disrupt, as the cells are protected by a  
326 tough outer layer composed of lipids, mycolic acids, polysaccharides (arabinoglycan)  
327 and peptidoglycans that make them highly resistant to lysis by standard chemical or  
328 enzymatic approaches. Strikingly, treatment with LSB at 65°C was toxic to the virulent  
329 Mtb H37Rv (ATCC 25618) strain, which would enable treated Mtb cells to be handled  
330 outside a BSL-3 facility. Mtb are very slow-growing, so for assay development we  
331 turned instead to *M. smegmatis* and BCG. We found that we were conveniently able to  
332 achieve DNA yields on the order of 20% from both bacteria by incubation of cells at  
333 65°C for 10 min in RADAR LSB, followed by isopropanol precipitation and centrifugation

334 at 21,000 g for 10 min using a standard benchtop microfuge (Fig. 4A). DNA yields from  
335 *M. smegmatis* or BCG were considerably improved by sonication, which is useful for  
336 large-scale preparation but requires specialized equipment for analysis of small  
337 volumes in microplate format.

338

### 339 **RADAR/ELISA detects MtTop1 DNA adducts in *M. smegmatis* cells**

340

341 To analyze adduct formation by MtTop1 expressed in *M. smegmatis*, we modified a  
342 construct for tetracycline-inducible expression of MtTop1 to carry an N-terminal FLAG  
343 (DDK) tag for immunodetection. We then generated mutations in MtTop1 at two  
344 positions reported to cause toxicity in other bacterial Top1 proteins (Fig. 4B, above).  
345 These included a D111N mutation, corresponding to the YpTop1-D117N mutation toxic  
346 in *E. coli* (11); and a G116S mutation, corresponding to mutations in Yp or EcTop1 that  
347 caused a dramatic decrease in cell viability and induced an SOS response in *E. coli*  
348 (10). Cloned DNA was introduced into *M. smegmatis* (mc<sup>2</sup>155), cells were cultured to  
349 early log phase (OD<sub>600</sub>~0.5), and MtTop1 expression induced by addition of anhydro-  
350 tetracycline (ATc, 50 ng/ml). Analysis of viable CFU in cells plated at 8 hr post-  
351 induction found that expression of MtTop1-D111N or MtTop1-G116S reduced viability  
352 only 2-fold, as shown by analysis of CFU recovered in two independent experiments  
353 (Fig. 4B, below). The limited toxicity may reflect structural differences between MtTop1  
354 and EcTop1 (9) and/or physiological differences between *E. coli* and *M. smegmatis*.

355 To quantify adducts by RADAR/ELISA assay, cells expressing MtTop1 WT,  
356 D111N or G116S were cultured to OD=0.5, then ATc added and cells cultured 0, 2 or 4  
357 hr post-induction. Adducts were then enriched by RADAR fractionation, and MtTop1-  
358 DNA complexes detected by direct ELISA with antibody to the N-terminal FLAG tag  
359 (Fig. 4C). Comparable ELISA signals were evident in RADAR fractions of cells  
360 expressing WT and mutant enzymes prior to induction of MtTop1 expression (t=0). The  
361 signal from extracts of cells expressing MtTop1 WT or the G116S mutant increased  
362 through the 4 hr induction period, and the signal from extracts of cells expressing the  
363 D111N mutant increased at 2 hr then dropped slightly by 4 hr.

364 We carried out CsCl buoyant density fractionation to confirm results of  
365 RADAR/ELISA. *M. smegmatis* cells expressing WT or mutant MtTop1 were cultured for  
366 4 hr with 50 ng/ml ATc, pelleted, lysed by sonication, and samples resolved on CsCl  
367 step gradients. Fractions were collected by puncturing the bottom of each tube.  
368 Fractions 5-9 were shown to contain the peak of DNA in each sample (Fig. 4D).  
369 Proteins in aliquots of each fraction were captured on a slot blot and FLAG-tagged Top1  
370 detected with anti-FLAG tag antibodies (Fig. 4E). Adduct recovery was quantified by  
371 summing signals determined by densitometry of DNA-containing fractions (5-9) and  
372 normalizing to DNA concentration (Fig. 4F). FLAG-Top1 signals at 4 hr post-induction

373 determined by density gradient centrifugation were found to be comparable to those  
374 determined by RADAR/ELISA.

375

## 376 **DISCUSSION**

377

378 Here we report a straightforward assay that directly quantifies bacterial Top1-DNA  
379 adducts by ELISA assay of RADAR-fractionated cells. We demonstrate that  
380 RADAR/ELISA assay can be used to quantify adducts formed by Top1 encoded by two  
381 different pathogenic bacteria, *Y. pestis* and *Mtb*.

382 Analysis of YpTop1 expressed in *E. coli* showed that RADAR/ELISA assay offers  
383 a simple approach for characterization of Top1 mutants YpTop1 WT and its highly toxic  
384 mutant derivative YpTop1-D117N were expressed in *E. coli*. Adducts formed by the  
385 YpTop1-D117N mutant were detected at greater levels than YpTop1 WT adducts, as  
386 assayed by RADAR/slot blot, RADAR/ELISA, or CsCl fractionation. The increased level  
387 of adducts suggests that this mutant, which is deficient in religation, mimics the effect of  
388 treatment with topoisomerase poisons.

389 The results presented here report analysis of N-terminal tagged recombinant  
390 Top1 expressed from inducible promoters and detected with epitope-specific tags. The  
391 tag enables assays of adducts formed by topoisomerases for which suitable, specific  
392 antibodies are not available commercially. The essay is optimized for bacterial Top1,  
393 but it can be extended to other epitope-tagged topoisomerase targets, such as gyrases.  
394 The utility of a tag will be limited if proteolytic cleavage occurs at sites between the tag  
395 and the Top1-DNA covalent bond. We have recently shown that proteolytic repair of  
396 human topoisomerase 1 can be assessed by RADAR fractionation combined with mass  
397 spectrometry (15). That approach could be readily adopted to determine whether  
398 bacterial topoisomerase-DNA adducts were targets of proteolytic cleavage.

399 Cell lysis may accompany cell killing that results from drug treatment. We found  
400 that fractionation of adducts from both cells and culture medium offers a work-around,  
401 although even with this approach adduct detection diminished at later times, likely  
402 reflecting proteolysis. This highlights the importance of kinetic analysis in optimizing  
403 assay conditions. RADAR/ELISA simplifies kinetic analyses by enabling large numbers  
404 of samples to be assayed in parallel.

405 RADAR/ELISA proved able to detect Top1-DNA adducts fractionated from either  
406 *E. coli* or *M. smegmatis* cells, providing a foundation for extension of the assay to other  
407 bacteria. The tough cell wall of Mycobacteria presents a considerable challenge to  
408 many biochemical approaches, but sufficient DNA was recovered by RADAR  
409 fractionation to enable quantification of adducts. This suggests that the approach can  
410 be extended to other bacteria. The results reported here thus provide a general  
411 foundation for discovery and optimization of drugs that poison bacterial Top1 using  
412 standard high-throughput approaches.

413  
414  
415  
416  
417  
418  
419  
420  
421  
422  
423  
424  
425  
426  
427  
428  
429  
430  
431  
432  
433  
434  
435  
436  
437  
438  
439  
440  
441  
442  
443  
444  
445  
446  
447  
448  
449  
450  
451

**SUPPLEMENTARY DATA** – none.

## **ACKNOWLEDGEMENTS**

We thank Dr. Yuk-Ching Tse-Dinh for providing *E. coli* strains bearing YpTop1 and for valuable advice on experimental design.

## **FUNDING**

National Institute of Allergy and Infectious Disease of the U.S. National Institutes of Health award number R21 AI123501 to N.M.

**CONFLICT OF INTEREST** – none.

## **REFERENCES**

1. Tse-Dinh, YC. 2015. Targeting bacterial topoisomerase I to meet the challenge of finding new antibiotics. *Future Med Chem* 7: 459-471.  
<https://www.ncbi.nlm.nih.gov/pubmed/25875873>
2. Tse-Dinh, YC. 2016. Targeting bacterial topoisomerases: how to counter mechanisms of resistance. *Future Med Chem* 8: 1085-1100.  
<https://www.ncbi.nlm.nih.gov/pubmed/27285067>
3. Chen, SH, Chan, NL, Hsieh, TS. 2013. New mechanistic and functional insights into DNA topoisomerases. *Annu Rev Biochem* 82: 139-170.  
<https://www.ncbi.nlm.nih.gov/pubmed/23495937>
4. Aldred, KJ, Kerns, RJ, Osheroff, N. 2014. Mechanism of quinolone action and resistance. *Biochemistry* 53: 1565-1574.  
[http://www.ncbi.nlm.nih.gov/entrez/query.fcgi?cmd=Retrieve&db=PubMed&dopt=Citation&list\\_uids=24576155](http://www.ncbi.nlm.nih.gov/entrez/query.fcgi?cmd=Retrieve&db=PubMed&dopt=Citation&list_uids=24576155)
5. Pendleton, M, Lindsey, RH, Jr., Felix, CA, Grimwade, D, Osheroff, N. 2014. Topoisomerase II and leukemia. *Ann N Y Acad Sci* 1310: 98-110.  
<https://www.ncbi.nlm.nih.gov/pubmed/24495080>
6. Pommier, Y, Leo, E, Zhang, H, Marchand, C. 2010. DNA topoisomerases and their poisoning by anticancer and antibacterial drugs. *Chem Biol* 17: 421-433.  
<https://www.ncbi.nlm.nih.gov/pubmed/20534341>
7. Nagaraja, V, Godbole, AA, Henderson, SR, Maxwell, A. 2017. DNA topoisomerase I and DNA gyrase as targets for TB therapy. *Drug Discov Today* 22: 510-518. <https://www.ncbi.nlm.nih.gov/pubmed/27856347>
8. Zhu, CX, Tse-Dinh, YC. 2000. The acidic triad conserved in type IA DNA topoisomerases is required for binding of Mg(II) and subsequent conformational

- 452 change. *J Biol Chem* 275: 5318-5322.  
453 <https://www.ncbi.nlm.nih.gov/pubmed/10681504>
- 454 9. Cao, N, Tan, K, Annamalai, T, Joachimiak, A, Tse-Dinh, YC. 2018. Investigating  
455 mycobacterial topoisomerase I mechanism from the analysis of metal and DNA  
456 substrate interactions at the active site. *Nucleic Acids Res* 46: 7296-7308.  
457 <https://www.ncbi.nlm.nih.gov/pubmed/29905859>
- 458 10. Cheng, B, Shukla, S, Vasunilashorn, S, Mukhopadhyay, S, Tse-Dinh, YC. 2005.  
459 Bacterial cell killing mediated by topoisomerase I DNA cleavage activity. *J Biol*  
460 *Chem* 280: 38489-38495.  
461 [http://www.ncbi.nlm.nih.gov/entrez/query.fcgi?cmd=Retrieve&db=PubMed&dopt=](http://www.ncbi.nlm.nih.gov/entrez/query.fcgi?cmd=Retrieve&db=PubMed&dopt=Citation&list_uids=16159875)  
462 [Citation&list\\_uids=16159875](http://www.ncbi.nlm.nih.gov/entrez/query.fcgi?cmd=Retrieve&db=PubMed&dopt=Citation&list_uids=16159875)
- 463 11. Cheng, B, Annamalai, T, Sorokin, E, Abrenica, M, Aedo, S, Tse-Dinh, YC. 2009.  
464 Asp-to-Asn substitution at the first position of the DxD TOPRIM motif of  
465 recombinant bacterial topoisomerase I is extremely lethal to *E. coli*. *J Mol Biol*  
466 385: 558-567.  
467 [http://www.ncbi.nlm.nih.gov/entrez/query.fcgi?cmd=Retrieve&db=PubMed&dopt=](http://www.ncbi.nlm.nih.gov/entrez/query.fcgi?cmd=Retrieve&db=PubMed&dopt=Citation&list_uids=19013470)  
468 [Citation&list\\_uids=19013470](http://www.ncbi.nlm.nih.gov/entrez/query.fcgi?cmd=Retrieve&db=PubMed&dopt=Citation&list_uids=19013470)
- 469 12. Bhat, AG, Leelaram, MN, Hegde, SM, Nagaraja, V. 2009. Deciphering the  
470 distinct role for the metal coordination motif in the catalytic activity of  
471 *Mycobacterium smegmatis* topoisomerase I. *J Mol Biol* 393: 788-802.  
472 <https://www.ncbi.nlm.nih.gov/pubmed/19733176>
- 473 13. Narula, G, Becker, J, Cheng, B, Dani, N, Abrenica, MV, Tse-Dinh, YC. 2010. The  
474 DNA relaxation activity and covalent complex accumulation of *Mycobacterium*  
475 *tuberculosis* topoisomerase I can be assayed in *Escherichia coli*: application for  
476 identification of potential FRET-dye labeling sites. *BMC Biochem* 11: 41.  
477 <https://www.ncbi.nlm.nih.gov/pubmed/20920291>
- 478 14. Rani, P, Nagaraja, V. 2019. Genome-wide mapping of Topoisomerase I activity  
479 sites reveal its role in chromosome segregation. *Nucleic Acids Res* 47: 1416-  
480 1427. <https://www.ncbi.nlm.nih.gov/pubmed/30566665>
- 481 15. Kiianitsa, K, Maizels, N. 2020. The “adductome”: a limited repertoire of adducted  
482 proteins in human cells. *DNA Repair*.  
483 <https://doi.org/10.1016/j.dnarep.2020.102825>
- 484 16. Kiianitsa, K, Maizels, N. 2013. A rapid and sensitive assay for DNA-protein  
485 covalent complexes in living cells. *Nucleic Acids Res* 41: e104.  
486 [http://www.ncbi.nlm.nih.gov/entrez/query.fcgi?cmd=Retrieve&db=PubMed&dopt=](http://www.ncbi.nlm.nih.gov/entrez/query.fcgi?cmd=Retrieve&db=PubMed&dopt=Citation&list_uids=23519618)  
487 [Citation&list\\_uids=23519618](http://www.ncbi.nlm.nih.gov/entrez/query.fcgi?cmd=Retrieve&db=PubMed&dopt=Citation&list_uids=23519618)
- 488 17. Kiianitsa, K, Maizels, N. 2014. Ultrasensitive isolation, identification and  
489 quantification of DNA-protein adducts by ELISA-based RADAR assay. *Nucleic*  
490 *Acids Res* 42: e108. <http://www.ncbi.nlm.nih.gov/pubmed/24914050>

- 491 18. Aldred, KJ, Schwanz, HA, Li, G, Williamson, BH, McPherson, SA, Turnbough,  
492 CL, Jr., Kerns, RJ, Osheroff, N. 2015. Activity of quinolone CP-115,955 against  
493 bacterial and human type II topoisomerases is mediated by different interactions.  
494 *Biochemistry* 54: 1278-1286. <https://www.ncbi.nlm.nih.gov/pubmed/25586498>
- 495 19. Aparicio, T, Baer, R, Gottesman, M, Gautier, J. 2016. MRN, CtIP, and BRCA1  
496 mediate repair of topoisomerase II-DNA adducts. *J Cell Biol* 212: 399-408.  
497 <https://www.ncbi.nlm.nih.gov/pubmed/26880199>
- 498 20. Velichko, AK, Petrova, NV, Razin, SV, Kantidze, OL. 2015. Mechanism of heat  
499 stress-induced cellular senescence elucidates the exclusive vulnerability of early  
500 S-phase cells to mild genotoxic stress. *Nucleic Acids Res* 43: 6309-6320.  
501 <https://www.ncbi.nlm.nih.gov/pubmed/26032771>
- 502 21. Vaz, B, Popovic, M, Newman, JA, Fielden, J, Aitkenhead, H, Halder, S, Singh,  
503 AN, Vendrell, I, Fischer, R, Torrecilla, I *et al.* 2016. Metalloprotease  
504 SPRTN/DVC1 Orchestrates Replication-Coupled DNA-Protein Crosslink Repair.  
505 *Mol Cell* 64: 704-719. <https://www.ncbi.nlm.nih.gov/pubmed/27871366>
- 506 22. Aldred, KJ, Payne, A, Voegerl, O. 2019. A RADAR-Based Assay to Isolate  
507 Covalent DNA Complexes in Bacteria. *Antibiotics (Basel)* 8.  
508 <https://www.ncbi.nlm.nih.gov/pubmed/30818799>
- 509 23. Mohni, KN, Wessel, SR, Zhao, R, Wojciechowski, AC, Luzwick, JW, Layden, H,  
510 Eichman, BF, Thompson, PS, Mehta, KPM, Cortez, D. 2019. HMCES Maintains  
511 Genome Integrity by Shielding Abasic Sites in Single-Strand DNA. *Cell* 176: 144-  
512 153 e113. <https://www.ncbi.nlm.nih.gov/pubmed/30554877>
- 513 24. Quinones, JL, Thapar, U, Yu, K, Fang, Q, Sobol, RW, Demple, B. 2015. Enzyme  
514 mechanism-based, oxidative DNA-protein cross-links formed with DNA  
515 polymerase beta in vivo. *Proc Natl Acad Sci U S A* 112: 8602-8607.  
516 <https://www.ncbi.nlm.nih.gov/pubmed/26124145>
- 517 25. Hu, Q, Klages-Mundt, N, Wang, R, Lynn, E, Kuma Saha, L, Zhang, H,  
518 Srivastava, M, Shen, X, Tian, Y, Kim, H *et al.* 2020. The ARK Assay Is a  
519 Sensitive and Versatile Method for the Global Detection of DNA-Protein  
520 Crosslinks. *Cell Rep* 30: 1235-1245 e1234.  
521 <https://www.ncbi.nlm.nih.gov/pubmed/31995761>
- 522 26. Nitiss, JL, Soans, E, Rogojina, A, Seth, A, Mishina, M. 2012. Topoisomerase  
523 assays. *Curr Protoc Pharmacol* Chapter 3: Unit 3 3.  
524 <https://www.ncbi.nlm.nih.gov/pubmed/22684721>
- 525 27. Minch, KJ, Rustad, TR, Peterson, EJ, Winkler, J, Reiss, DJ, Ma, S, Hickey, M,  
526 Brabant, W, Morrison, B, Turkarslan, S *et al.* 2015. The DNA-binding network of  
527 *Mycobacterium tuberculosis*. *Nat Commun* 6: 5829.  
528 <https://www.ncbi.nlm.nih.gov/pubmed/25581030>
- 529 28. Mdluli, K, Sherman, DR, Hickey, MJ, Kreiswirth, BN, Morris, S, Stover, CK, Barry,  
530 CE, 3rd. 1996. Biochemical and genetic data suggest that InhA is not the primary

- 531 target for activated isoniazid in Mycobacterium tuberculosis. J Infect Dis 174:  
532 1085-1090. <https://www.ncbi.nlm.nih.gov/pubmed/8896513>
- 533 29. Ehrh, S, Guo, XV, Hickey, CM, Ryou, M, Monteleone, M, Riley, LW,  
534 Schnappinger, D. 2005. Controlling gene expression in mycobacteria with  
535 anhydrotetracycline and Tet repressor. Nucleic Acids Res 33: e21.  
536 <https://www.ncbi.nlm.nih.gov/pubmed/15687379>
- 537 30. Aedo, S, Tse-Dinh, YC. 2012. Isolation and quantitation of topoisomerase  
538 complexes accumulated on Escherichia coli chromosomal DNA. Antimicrob  
539 Agents Chemother 56: 5458-5464.  
540 <https://www.ncbi.nlm.nih.gov/pubmed/22869559>
- 541 31. Ahmed, W, Menon, S, Godbole, AA, Karthik, PV, Nagaraja, V. 2014. Conditional  
542 silencing of topoisomerase I gene of Mycobacterium tuberculosis validates its  
543 essentiality for cell survival. FEMS Microbiol Lett 353: 116-123.  
544 <https://www.ncbi.nlm.nih.gov/pubmed/24593153>
- 545 32. Ravishankar, S, Ambady, A, Awasthy, D, Mudugal, NV, Menasinakai, S,  
546 Jatheendranath, S, Guptha, S, Sharma, S, Balakrishnan, G, Nandishaiah, R *et*  
547 *al.* 2015. Genetic and chemical validation identifies Mycobacterium tuberculosis  
548 topoisomerase I as an attractive anti-tubercular target. Tuberculosis (Edinb) 95:  
549 589-598. <https://www.ncbi.nlm.nih.gov/pubmed/26073894>
- 550 33. Ahmed, W, Menon, S, Karthik, PV, Nagaraja, V. 2015. Reduction in DNA  
551 topoisomerase I level affects growth, phenotype and nucleoid architecture of  
552 Mycobacterium smegmatis. Microbiology 161: 341-353.  
553 <https://www.ncbi.nlm.nih.gov/pubmed/25516959>  
554

555 **FIGURE LEGENDS**

556

557 **Figure 1.** Topoisomerase 1 forms DNA adducts.

558 **(A) Top line:** Bacterial topoisomerase 1 (Top1) nicks a single strand of the backbone of  
559 supercoiled DNA to form a covalent 5'-phosphoryl-tyrosine linkage and relax the  
560 supercoil. The adduct is released upon DNA religation, which may be accompanied by  
561 restored supercoiling, as shown. Drugs (*middle line*) or mutations (*bottom line*) that  
562 prevent religation (“topoisomerase poisons”) impair release of the protein-DNA adduct  
563 to cause cell killing. Images of supercoiled and relaxed circles from Wikicommons.

564 **(B)** Conserved Top1 TOPRIM domain sequences from *Y. pestis* (Yp), *E. coli* (Ec), *M.*  
565 *tuberculosis* (Mt) and *M. smegmatis* (Ms).

566 **(C)** Cell lysis in RADAR buffer (chaotropic salts and detergent) followed by alcohol  
567 precipitation enriches protein-DNA protein adducts, which are then captured for  
568 immunodetection by ELISA assay (shown) or slot blot.

569

570 **Figure 2.** Quantification of YpTop1 WT and YpTop1-D117N DNA adducts by RADAR  
571 slot blot and CsCl buoyant density fractionation

572 **(A)** Growth kinetics (OD<sub>600</sub>) of cultures of *E. coli* bearing arabinose-inducible expression  
573 clones for TRX-tagged YpTop1 WT and YpTop1-D117N, assayed from 0-240 minutes  
574 after induction with indicated concentration of arabinose.

575 **(B)** Representative assay of CFU recovered from *E. coli* expressing YpTop1 WT and  
576 YpTop1-D117N, assayed at 180 minutes of culture with 0.02% arabinose.

577 **(C)** Slot blot of RADAR-fractionated extracts isolated from *E. coli* at 150 min post-  
578 induction of expression of YpTop1 WT or YpTop1-D117N by culture with arabinose.  
579 Immunodetection was performed with antibodies to TRX epitope.

580 **(D)** Quantification of DNA recovery by CsCl gradient fractionation of extracts of cells  
581 that were uninduced or induced by 150 min culture with arabinose.

582 **(E)** Slot blot of extracts of uninduced and induced cells fractionated by CsCl density  
583 gradient centrifugation. *Bottom*, bottom of gradient.

584 **(F)** Quantification of TRX-tagged YpTop1 derivatives recovered by CsCl gradient  
585 fractionation and detected by slot blot.

586

587 **Figure 3.** Reproducible RADAR/ELISA assay in microtiter format.

588 **(A)** Flowchart for adduct recovery from cells cultured in microtiter format.

589 **(B)** RADAR/ELISA assay of YpTop1 signal from pelleted cells expressing YpTop1-  
590 D117N at indicated times after induction of expression with arabinose (0.2%).

591 **(C)** Homogeneous RADAR/ELISA assay of YpTop1 signal from entire culture (cells and  
592 media) expressing YpTop1-D117N at indicated times after induction of expression with  
593 arabinose (0.2%).



594 (D) Z' factors of homogenous Top1 RADAR/ELISA assays calculated at indicated times  
595 post-induction of protein expression.

596

597 **Figure 4.** RADAR/ELISA quantifies MtTop1 DNA adducts in *M. smegmatis*

598 (A) Recovery of DNA from (left) *M. smegmatis* (ng/10<sup>8</sup> cells) or (right) BCG. Bacterial  
599 lysis was performed in LSB supplemented with NaOH at indicated concentrations and in  
600 the absence/presence 2% NP-40, followed by alcohol precipitation to recover DNA. Kit:  
601 DNA was isolated using the commercial MagJET Genomic DNA Kit.

602 (B) Above, TOPRIM domain sequences of WT and mutant MtTop1. Below,  
603 CFU recovered from *M. smegmatis* expressing MtTop1 WT and indicated mutants at 8  
604 hr after induction of MtTop1 expression with ATc. Colonies were counted after 3 days  
605 growth at 37°C on plates containing 200 µg/ml hygromycin B. Shown are absolute  
606 values and survival normalized to cells expressing MtTop1 WT.

607 (C) RADAR/ELISA assay of FLAG-MtTop1 signal from pelleted cells expressing WT  
608 and mutant FLAG-MtTop1 at indicated times after induction of expression with ATc (50  
609 ng/ml).

610 (D) Quantification of DNA recovered in CsCl gradient fractions of extracts of *M.*  
611 *smegmatis* cells expressing FLAG-MtTop1 WT and indicated mutants following 4 hr  
612 induction with ATc. Bottom, bottom of gradient.

613 (E) Slot blot detection of FLAG-tagged MtTop1 derivatives in indicated CsCl density  
614 gradient fractions. Bottom, bottom of gradient.

615 (F) Quantification of recovery of FLAG-MtTop1 from WT and mutant derivatives. Each  
616 signal represents the total from fractions 5-9, which contain the peak of DNA.

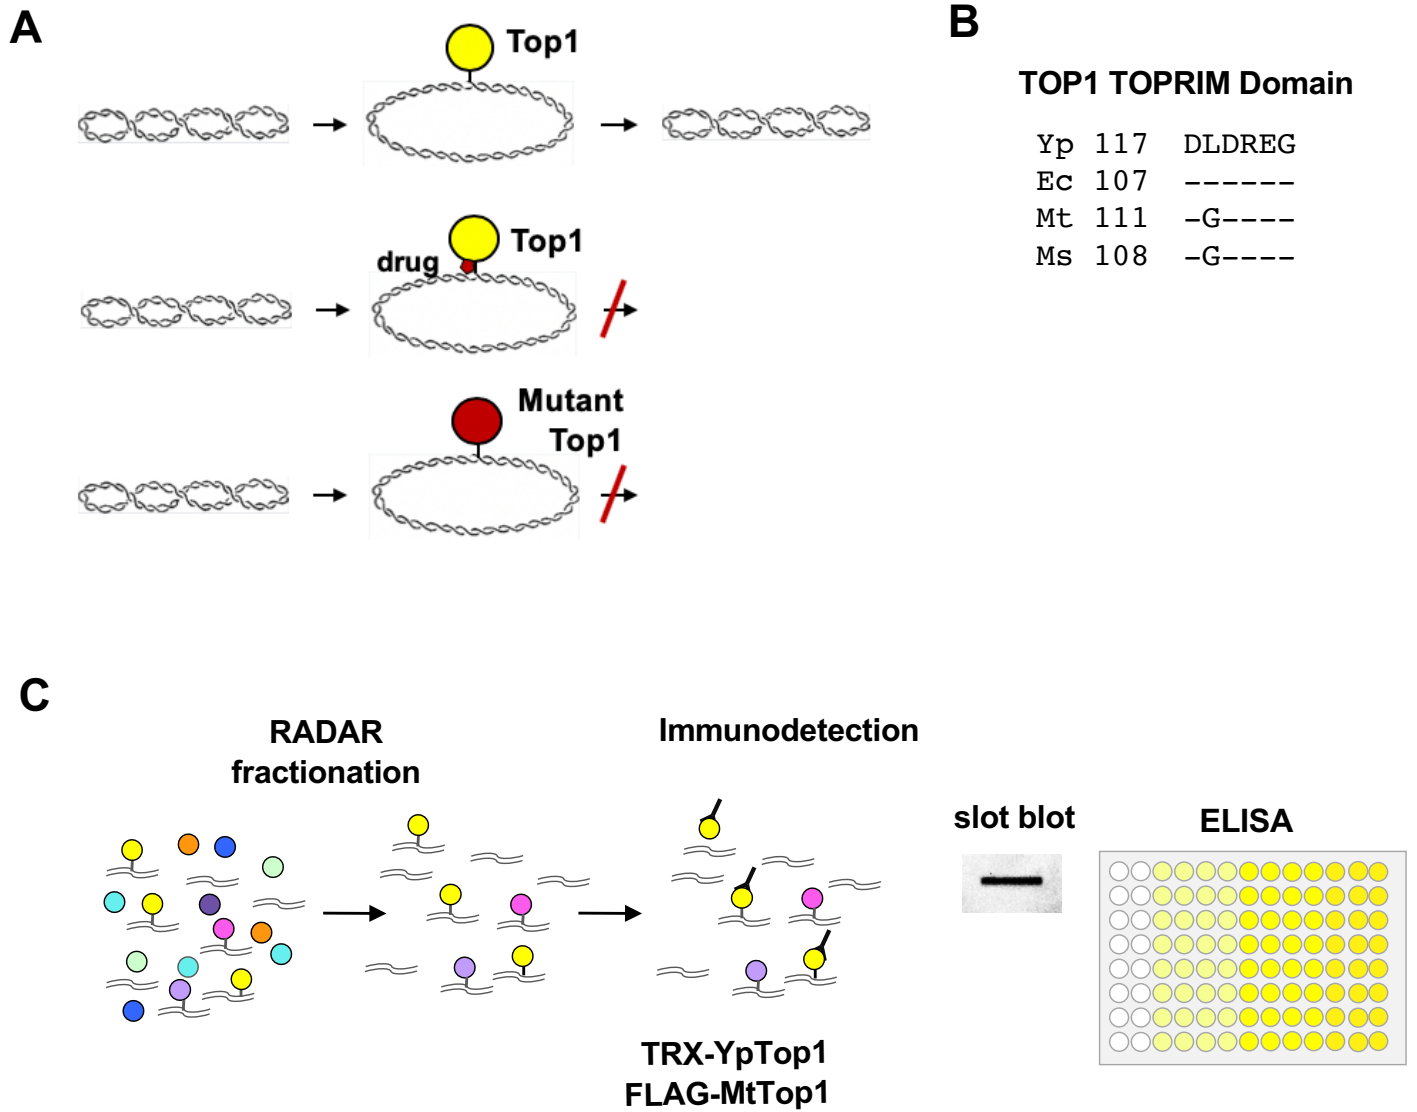

Figure 1

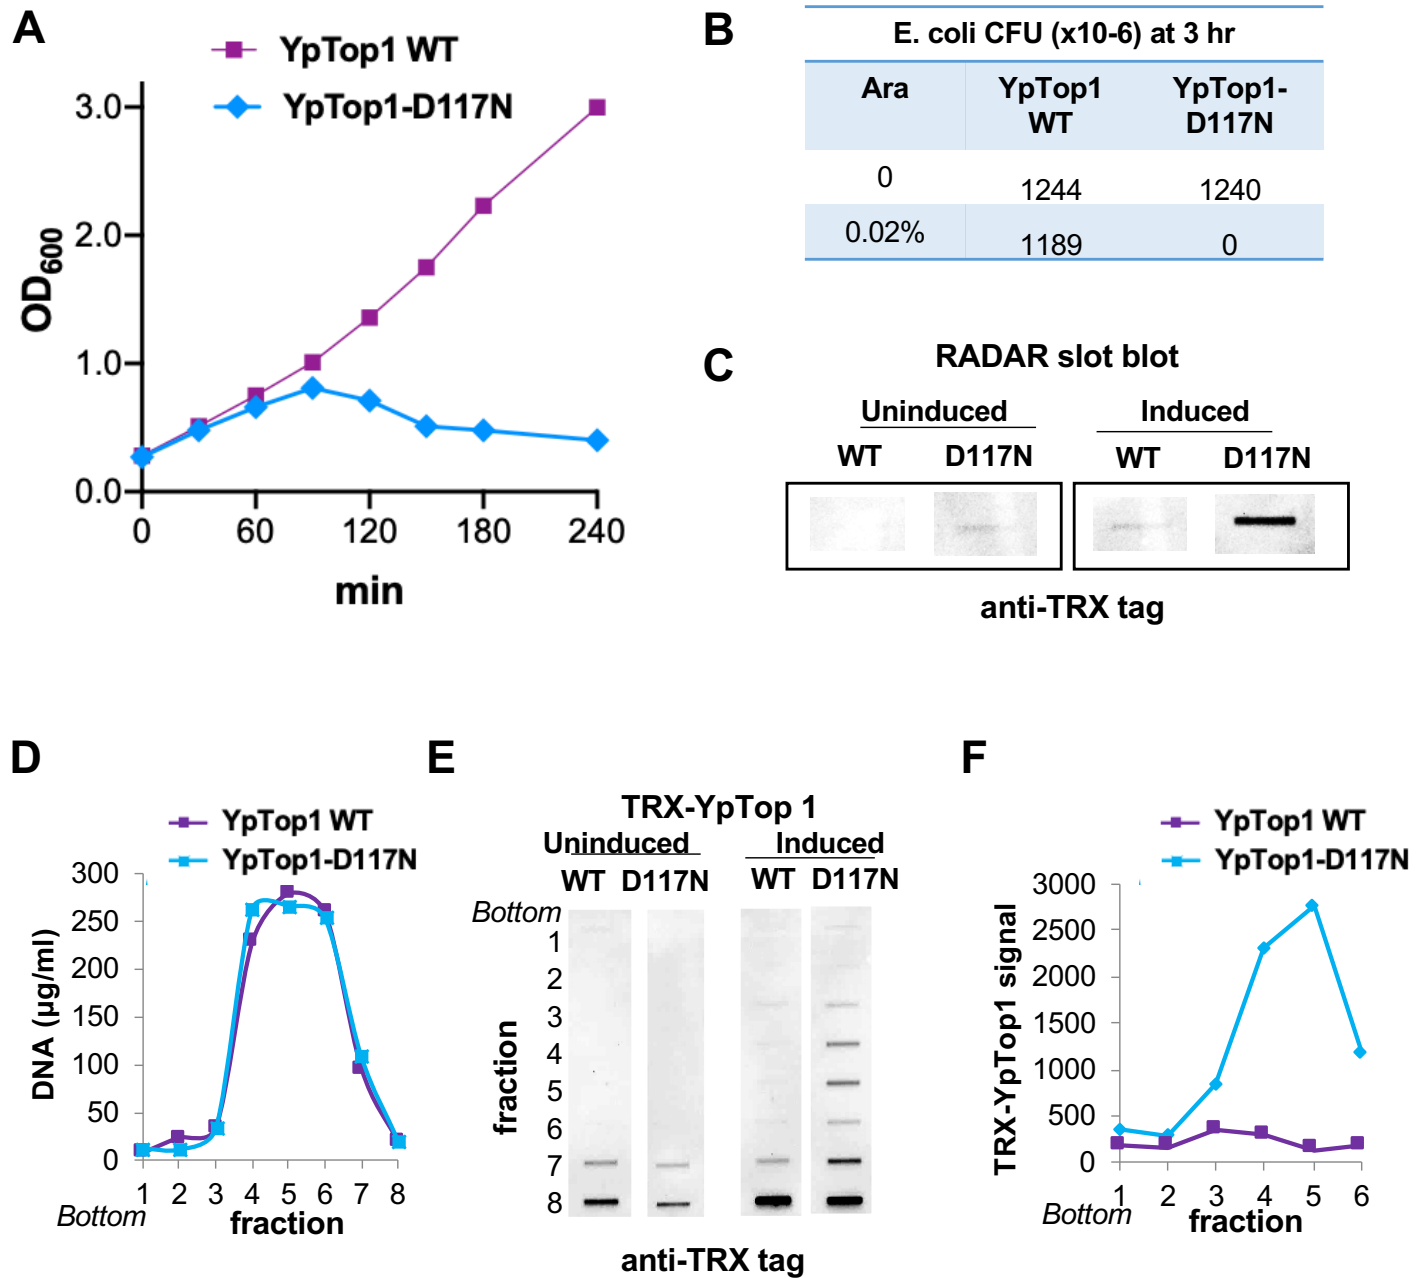

Figure 2

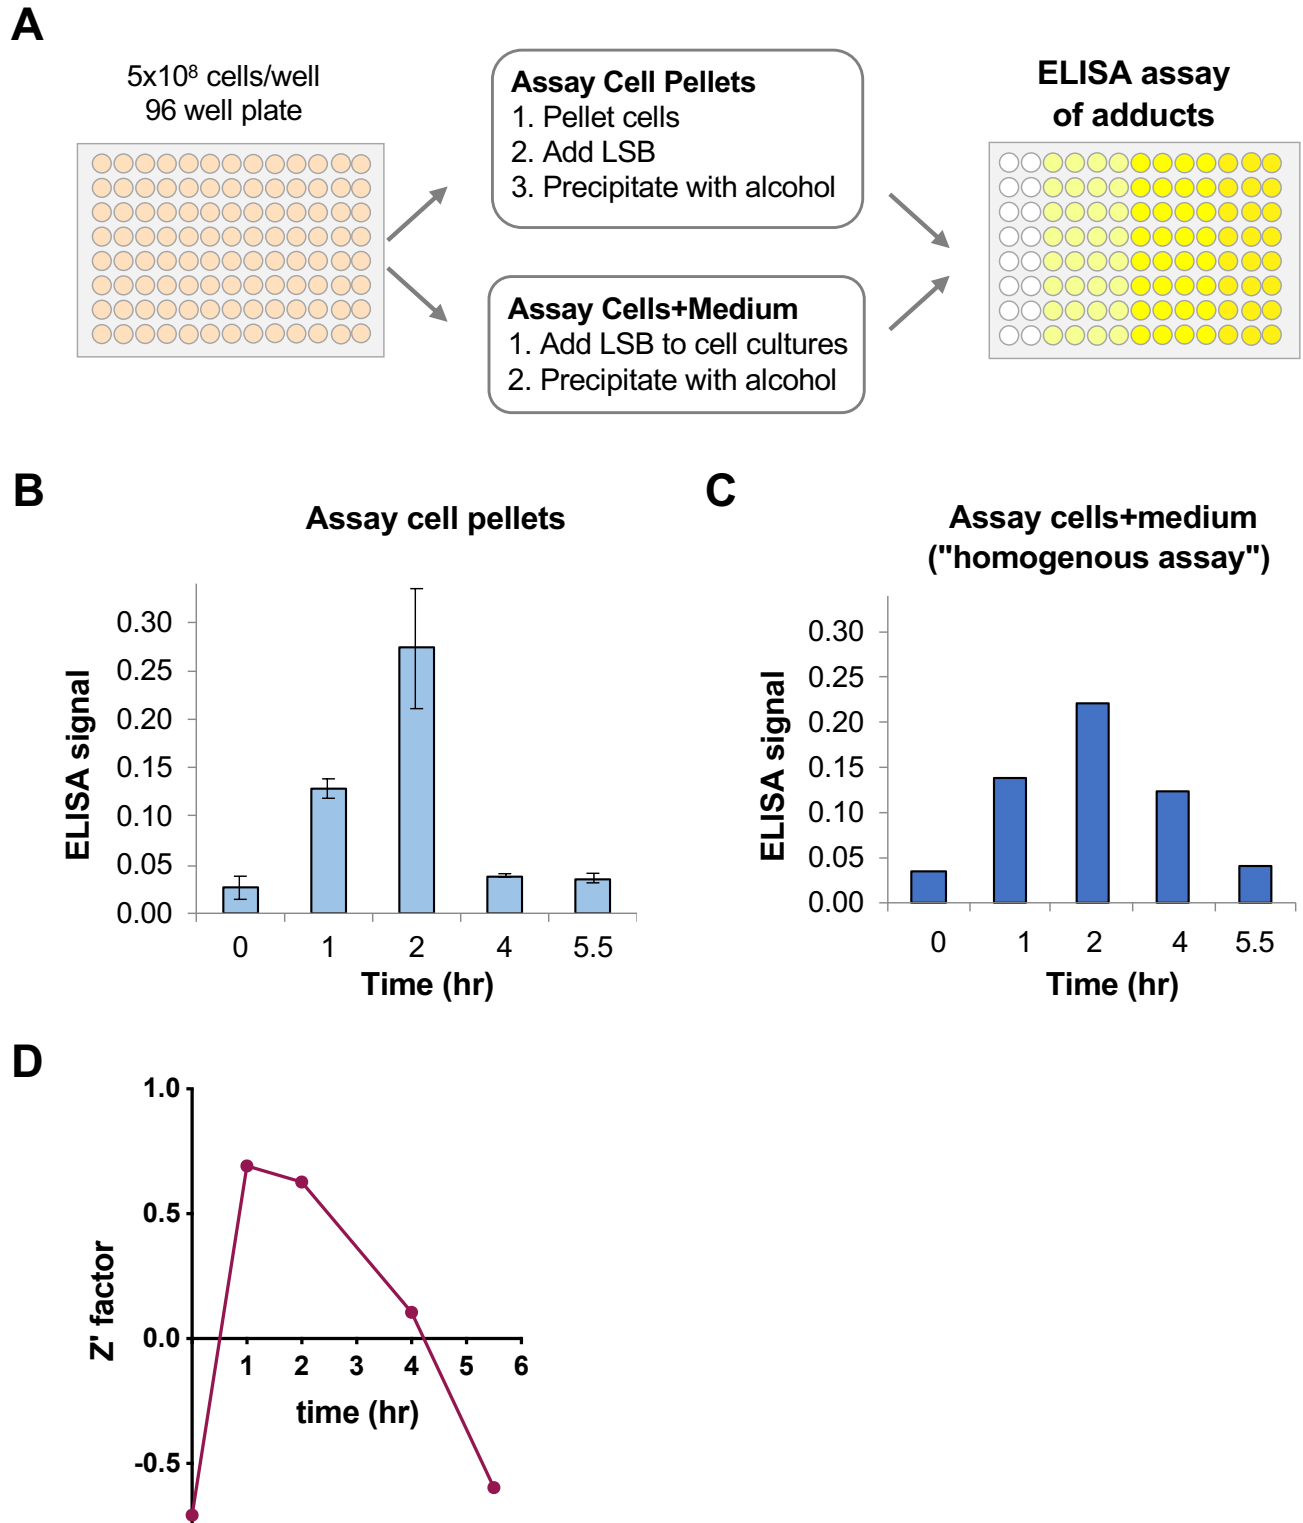

Figure 3

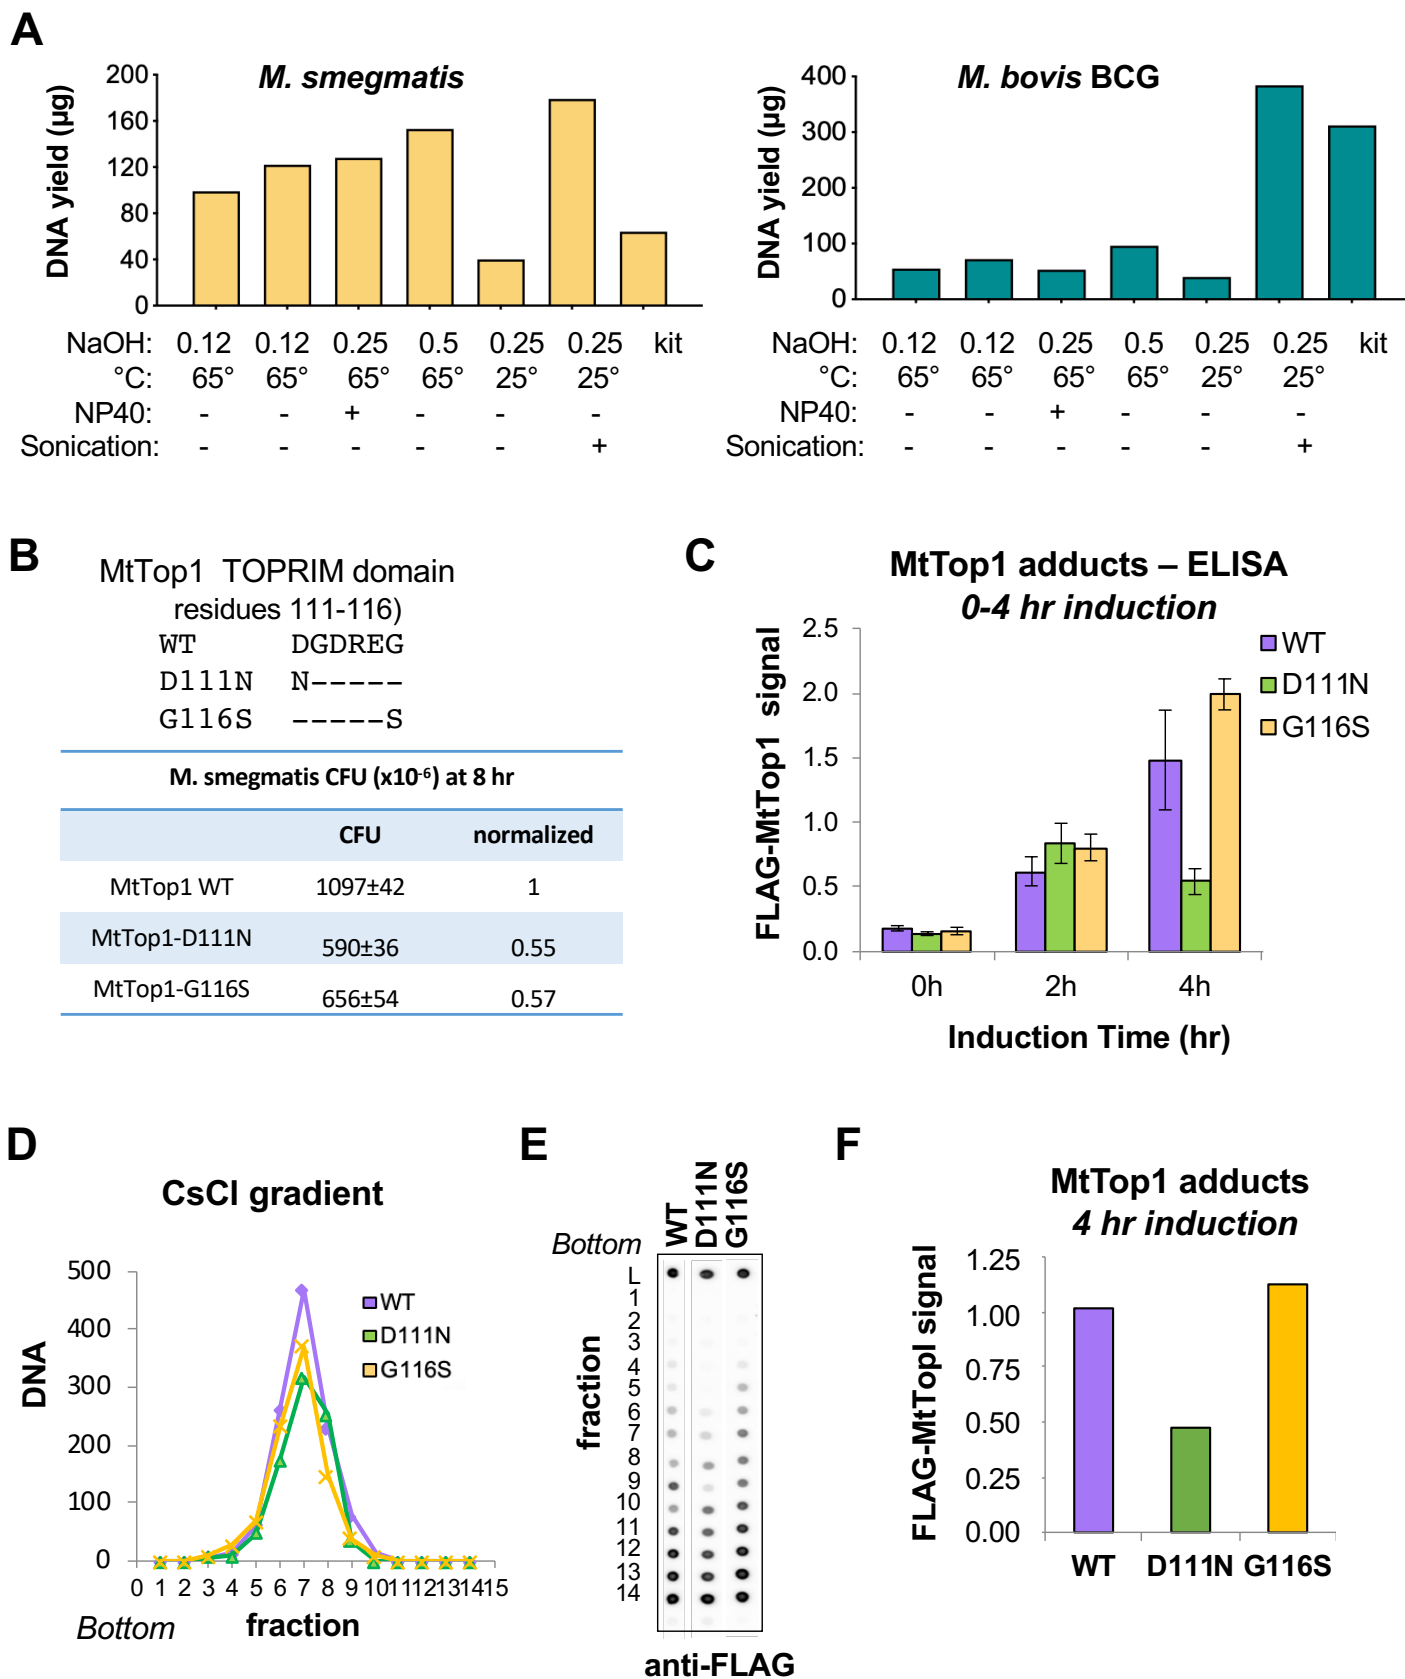

Figure 4
